# Supplementary material
Source: PubMed Central journal article supplement (PMC3429766)

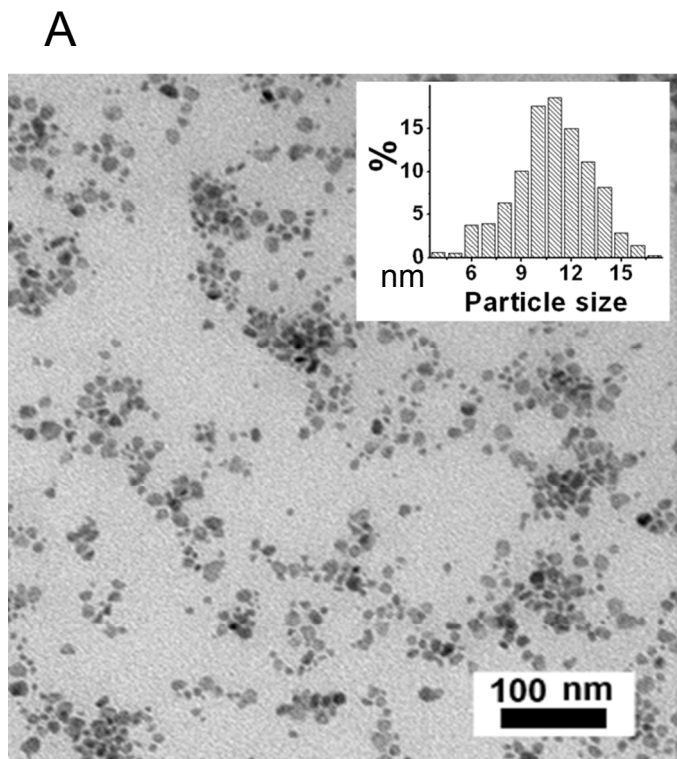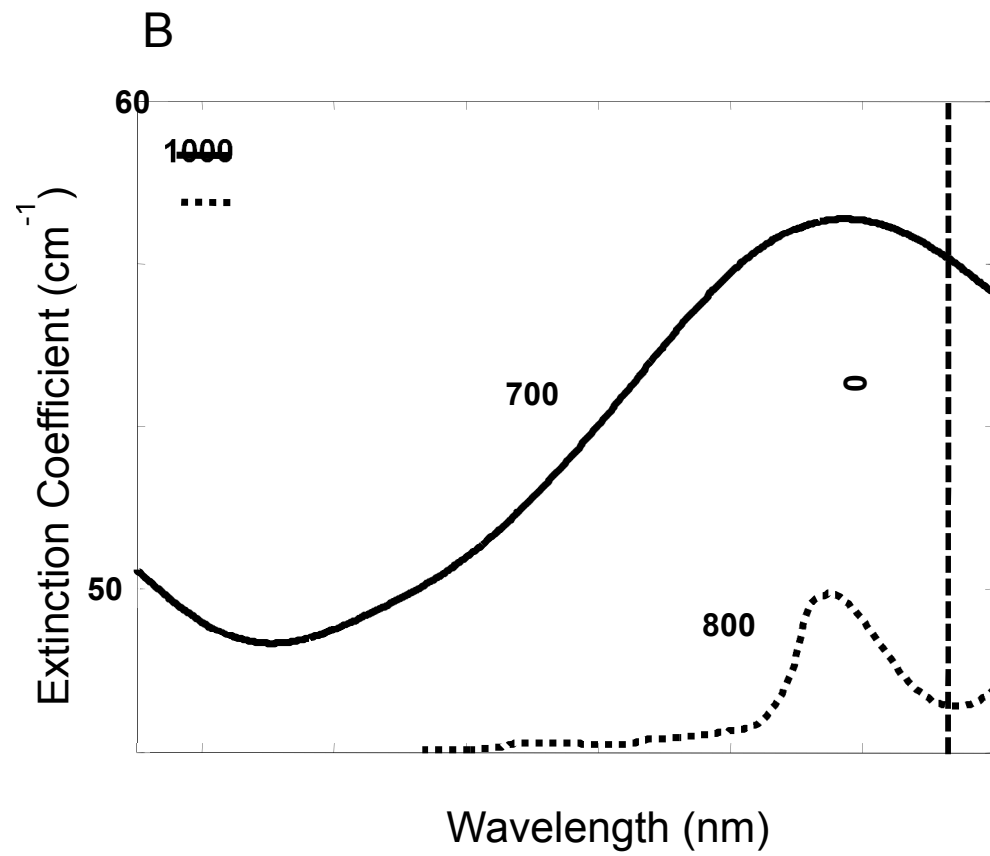

Fig. 1

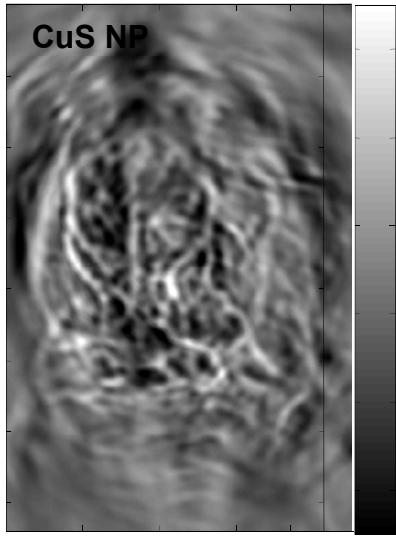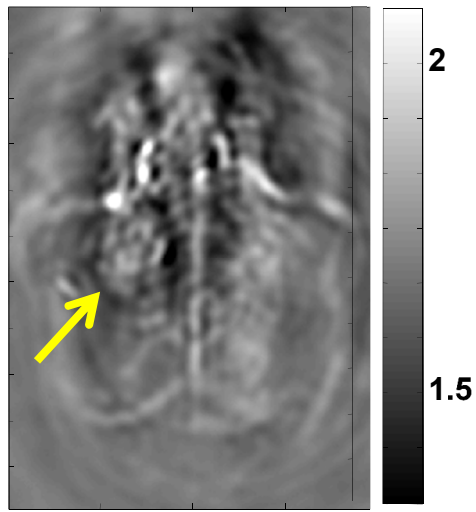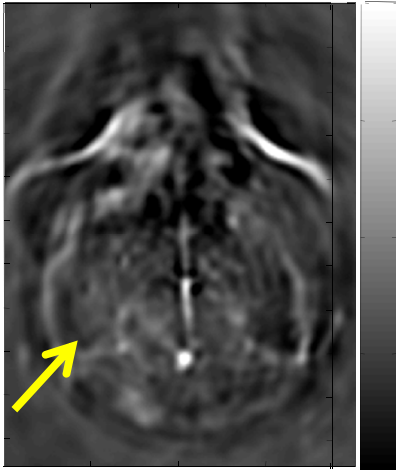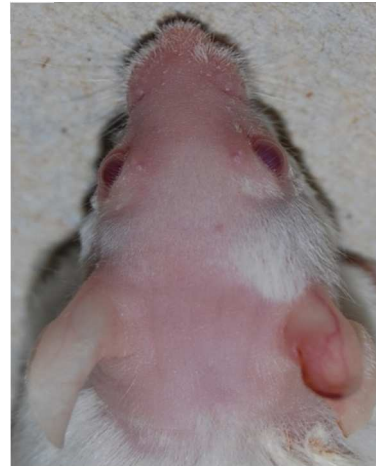

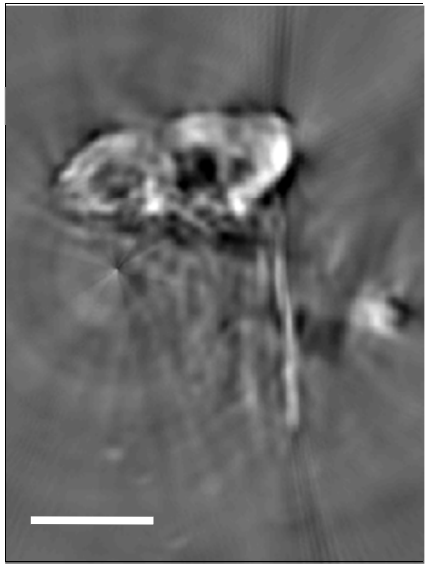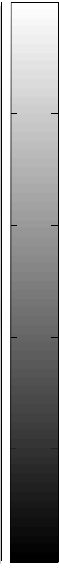

PA Inten:

Fi

g.  
2

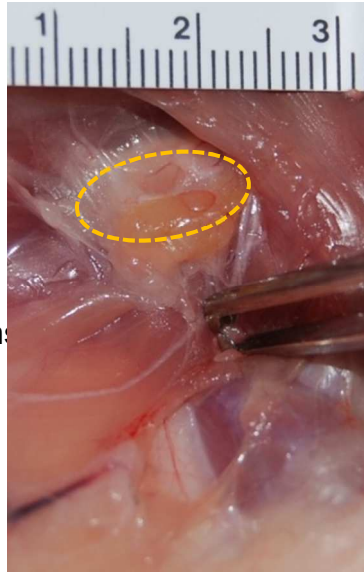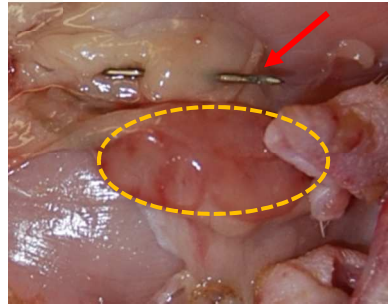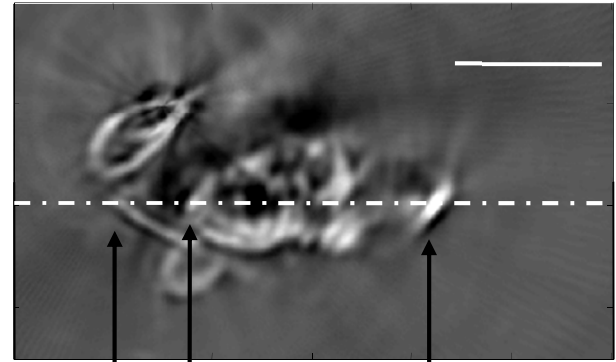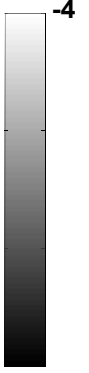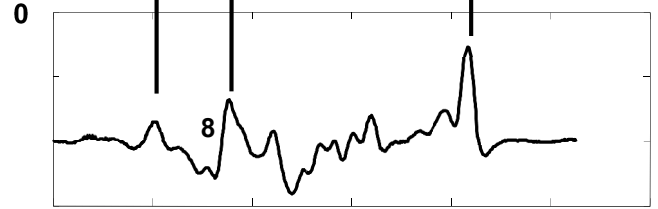

4

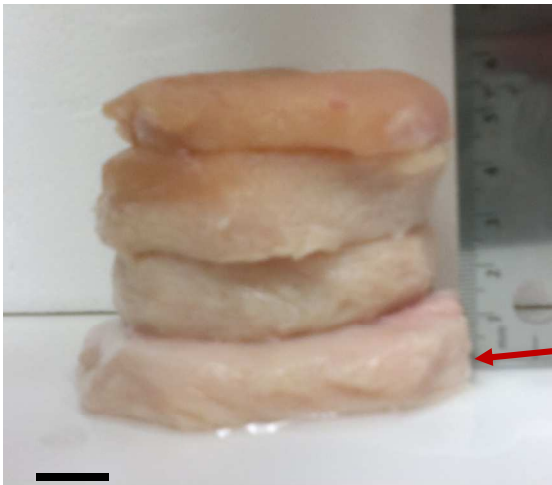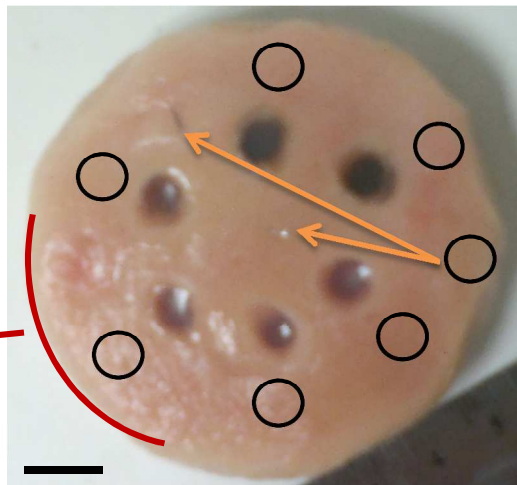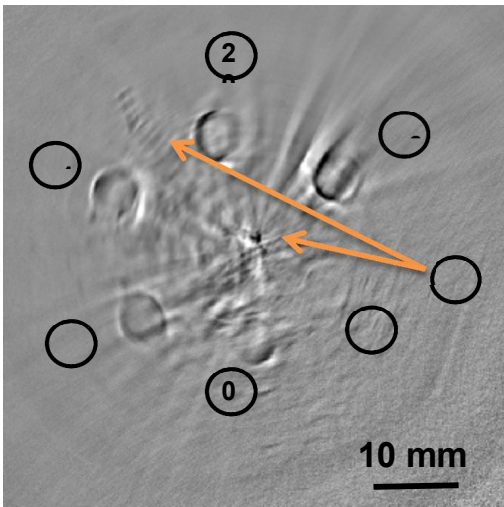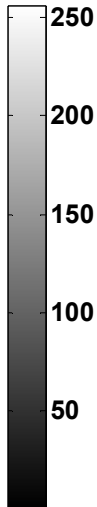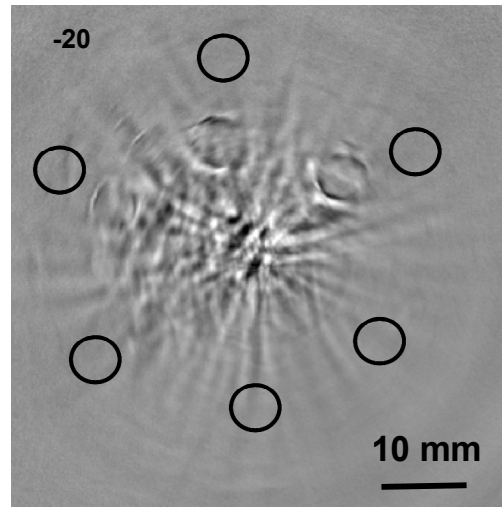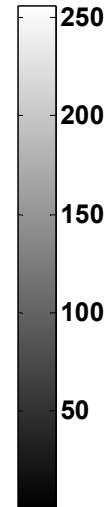

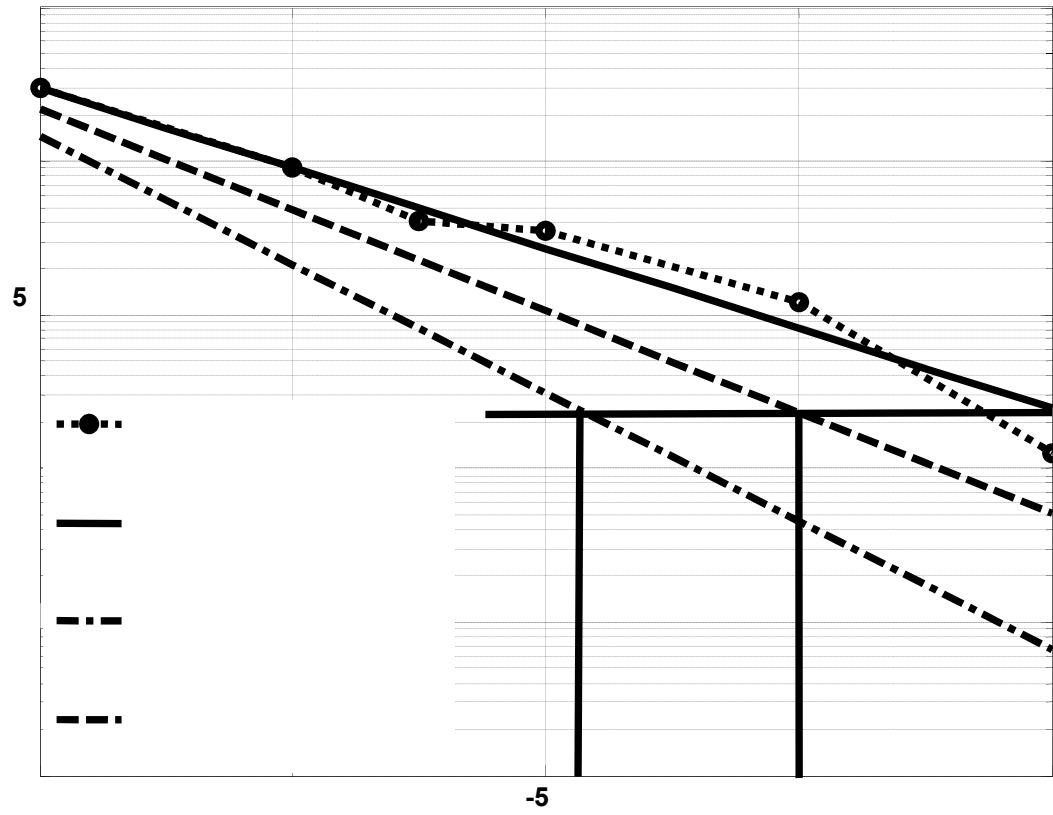

Supplement: NIHMS395909-supplement-1_si_001.pdf [file NIHMS395909-supplement-1_si_001.pdf]
